# Supplementary material for: How Does Income Heterogeneity Affect Future Perspectives on Food Consumption? Empirical Evidence from Urban China
Source: MDPI journal article supplement (doi:10.3390/foods11172597), 2022-08-26
Supplement: s1 [file s1]

**Table S1.** Conditional Marshall price elasticity and conditional expenditure elasticity (full sample)

|                                    | Rice              | Wheat             | Oils              | Pork              | Beef              | Mutton            | Poultry           | Eggs              | Diary             | Seafood           | Vegetables        | Fruits            | Other grains      |
|------------------------------------|-------------------|-------------------|-------------------|-------------------|-------------------|-------------------|-------------------|-------------------|-------------------|-------------------|-------------------|-------------------|-------------------|
| Conditional price elasticity       |                   |                   |                   |                   |                   |                   |                   |                   |                   |                   |                   |                   |                   |
| Rice                               | <b>-1.065</b> *** | 0.007***          | -0.014***         | -0.019***         | -0.001*           | 0.021***          | 0.002***          | -0.089***         | -0.014***         | -0.041***         | -0.122***         | -0.001            | 0.423***          |
| Wheat                              | 0.011***          | <b>-1.194</b> *** | -0.036***         | 0.007***          | 0.041***          | 0.037***          | 0.041***          | -0.091***         | -0.021***         | 0.000             | 0.106***          | -0.012***         | 0.185***          |
| Oils                               | -0.037***         | -0.010***         | <b>-0.968</b> *** | 0.002***          | -0.005***         | 0.005***          | -0.004***         | -0.025***         | 0.008***          | -0.011***         | -0.037***         | 0.001***          | 0.054***          |
| Pork                               | 0.023***          | 0.006***          | 0.001***          | <b>-0.804</b> *** | 0.001***          | -0.020***         | -0.003***         | -0.047***         | -0.017***         | -0.020***         | -0.096***         | -0.042***         | 0.013***          |
| Beef                               | 0.201***          | 0.002***          | 0.014***          | -0.023***         | <b>-0.788</b> *** | -0.017***         | 0.036***          | 0.051***          | -0.041***         | 0.050***          | 0.026***          | 0.005***          | -0.919***         |
| Mutton                             | -0.027***         | 0.012***          | 0.031***          | -0.205***         | 0.000             | <b>-0.775</b> *** | 0.019***          | 0.126***          | -0.034***         | 0.045***          | -0.018***         | 0.029***          | -0.498***         |
| Poultry                            | 0.009***          | 0.010***          | -0.002***         | -0.008***         | 0.016***          | 0.007***          | <b>-1.002</b> *** | -0.008***         | -0.010***         | 0.005***          | -0.008***         | -0.005***         | -0.016***         |
| Eggs                               | -0.122***         | 0.001***          | -0.031***         | -0.173***         | -0.042***         | -0.009***         | 0.002***          | <b>-0.676</b> *** | -0.018***         | -0.029***         | -0.149***         | -0.009***         | 0.437***          |
| Diary                              | -0.045***         | -0.011***         | -0.002***         | 0.050***          | -0.015***         | -0.017***         | -0.015***         | 0.177***          | <b>-0.857</b> *** | 0.025***          | 0.065***          | 0.049***          | -0.461***         |
| Seafood                            | -0.043***         | 0.003***          | -0.022***         | -0.091***         | -0.005***         | 0.001***          | -0.007***         | -0.035***         | -0.016***         | <b>-0.861</b> *** | -0.102***         | 0.014***          | 0.000             |
| Vegetables                         | -0.051***         | 0.000             | -0.007***         | -0.091***         | -0.023***         | -0.004***         | 0.004***          | -0.042***         | -0.015***         | -0.022***         | <b>-0.749</b> *** | -0.030***         | 0.101***          |
| Fruits                             | 0.018***          | -0.002***         | 0.006***          | -0.074***         | -0.021***         | 0.004***          | 0.002***          | -0.010***         | 0.012***          | 0.024***          | -0.059***         | <b>-0.892</b> *** | 0.043***          |
| Other grains                       | 1.842***          | 0.281***          | 0.269***          | 0.228***          | -1.790***         | -0.649***         | -0.080***         | 1.308***          | -2.162***         | 0.030***          | 1.245***          | 0.301***          | <b>-1.563</b> *** |
| Conditional expenditure elasticity | 0.912***          | 0.926***          | 1.028***          | 1.005***          | 1.403***          | 1.296***          | 1.012***          | 0.818***          | 1.058***          | 1.163***          | 0.930***          | 0.949***          | 0.740***          |

Notes: \* p < 0.10 , \*\*\* p < 0.01. The bold font is own-price elasticity.

Table S2. Conditional Hicksian price elasticity (full sample)

|              | Rice              | Wheat             | Oils              | Pork              | Beef              | Mutton            | Poultry           | Eggs              | Diary             | Seafood           | Vegetables        | Fruits            | Other grains      |
|--------------|-------------------|-------------------|-------------------|-------------------|-------------------|-------------------|-------------------|-------------------|-------------------|-------------------|-------------------|-------------------|-------------------|
| Rice         | <b>-1.005</b> *** | 0.028***          | 0.051***          | 0.166***          | 0.027***          | 0.039***          | 0.095***          | -0.047***         | 0.052***          | 0.021***          | 0.046***          | 0.091***          | 0.437***          |
| Wheat        | 0.072***          | <b>-1.173</b> *** | 0.029***          | 0.195***          | 0.068***          | 0.055***          | 0.136***          | -0.049***         | 0.046***          | 0.064***          | 0.276***          | 0.081***          | 0.199***          |
| Oils         | 0.031***          | 0.013***          | <b>-0.895</b> *** | 0.210***          | 0.026***          | 0.026***          | 0.101***          | 0.022***          | 0.082***          | 0.059***          | 0.152***          | 0.104***          | 0.069***          |
| Pork         | 0.090***          | 0.029***          | 0.072***          | <b>-0.600</b> *** | 0.031***          | 0.000             | 0.099***          | -0.002***         | 0.056***          | 0.049***          | 0.089***          | 0.058***          | 0.028***          |
| Beef         | 0.294***          | 0.035***          | 0.114***          | 0.261***          | <b>-0.746</b> *** | 0.011***          | 0.179***          | 0.115***          | 0.061***          | 0.146***          | 0.284***          | 0.145***          | -0.898***         |
| Mutton       | 0.059***          | 0.041***          | 0.123***          | 0.057***          | 0.039***          | <b>-0.749</b> *** | 0.152***          | 0.185***          | 0.059***          | 0.133***          | 0.220***          | 0.158***          | -0.479***         |
| Poultry      | 0.076***          | 0.033***          | 0.069***          | 0.197***          | 0.046***          | 0.027***          | <b>-0.898</b> *** | 0.038***          | 0.063***          | 0.075***          | 0.178***          | 0.096***          | -0.001***         |
| Eggs         | -0.068***         | 0.020***          | 0.027***          | -0.007***         | -0.018***         | 0.007***          | 0.085***          | <b>-0.639</b> *** | 0.042***          | 0.027***          | 0.001             | 0.072***          | 0.450***          |
| Diary        | 0.025***          | 0.013***          | 0.073***          | 0.264***          | 0.017***          | 0.004***          | 0.093***          | 0.225***          | <b>-0.781</b> *** | 0.098***          | 0.259***          | 0.155***          | -0.445***         |
| Seafood      | 0.034***          | 0.029***          | 0.060***          | 0.145***          | 0.030***          | 0.024***          | 0.112***          | 0.018***          | 0.068***          | <b>-0.781</b> *** | 0.112***          | 0.130***          | 0.018***          |
| Vegetables   | 0.010***          | 0.021***          | 0.058***          | 0.098***          | 0.005***          | 0.014***          | 0.099***          | 0.000             | 0.053***          | 0.042***          | <b>-0.578</b> *** | 0.063***          | 0.115***          |
| Fruits       | 0.081***          | 0.020***          | 0.073***          | 0.118***          | 0.007***          | 0.024***          | 0.099***          | 0.033***          | 0.081***          | 0.090***          | 0.115***          | <b>-0.798</b> *** | 0.057***          |
| Other grains | 1.890***          | 0.298***          | 0.321***          | 0.378***          | -1.768***         | -0.634***         | -0.004***         | 1.341***          | -2.108***         | 0.081***          | 1.381***          | 0.375***          | <b>-1.551</b> *** |

Notes: \*\*\* p < 0.01. The bold font is own-price elasticity.

**Table S3.** Unconditional Marshall price elasticity and income elasticity (low-income group)

|                                | Rice              | Wheat             | Oils              | Pork              | Beef              | Mutton            | Poultry           | Eggs              | Diary             | Seafood           | Vegetables        | Fruits            | Other grains      |
|--------------------------------|-------------------|-------------------|-------------------|-------------------|-------------------|-------------------|-------------------|-------------------|-------------------|-------------------|-------------------|-------------------|-------------------|
| Unconditional price elasticity |                   |                   |                   |                   |                   |                   |                   |                   |                   |                   |                   |                   |                   |
| Rice                           | <b>-1.152</b> *** | 0.010***          | -0.012***         | 0.052***          | -0.014***         | 0.011***          | 0.023***          | -0.135***         | 0.000***          | -0.029***         | -0.074***         | 0.038***          | 0.463***          |
| Wheat                          | 0.015***          | <b>-1.233</b> *** | -0.040***         | 0.092***          | 0.054***          | 0.047***          | 0.042***          | -0.053***         | -0.004***         | -0.056***         | 0.204***          | 0.026***          | 0.135***          |
| Oils                           | -0.029***         | -0.013***         | <b>-0.992</b> *** | 0.064***          | -0.012***         | 0.003***          | 0.023***          | -0.022***         | 0.030***          | -0.010***         | -0.008***         | 0.028***          | 0.059***          |
| Pork                           | 0.060***          | 0.019***          | 0.024***          | <b>-0.826</b> *** | 0.004***          | -0.030***         | 0.007***          | -0.039***         | -0.004***         | -0.002***         | -0.025***         | -0.036***         | -0.020***         |
| Beef                           | 0.253***          | 0.023***          | 0.032***          | 0.072***          | <b>-0.786</b> *** | -0.018***         | 0.091***          | 0.092***          | -0.006***         | 0.050***          | 0.113***          | 0.015***          | -1.136***         |
| Mutton                         | -0.042***         | 0.034***          | 0.048***          | -0.253***         | 0.001***          | <b>-0.687</b> *** | 0.062***          | 0.154***          | -0.020***         | 0.077***          | 0.078***          | 0.092***          | -0.701***         |
| Poultry                        | 0.035***          | 0.014***          | 0.019***          | 0.016***          | 0.023***          | 0.012***          | <b>-0.975</b> *** | 0.002***          | -0.010***         | 0.008***          | 0.020***          | -0.001***         | -0.021***         |
| Eggs                           | -0.197***         | 0.005***          | -0.044***         | -0.155***         | -0.046***         | -0.018***         | 0.008***          | <b>-0.587</b> *** | -0.026***         | -0.052***         | -0.125***         | -0.001***         | 0.555***          |
| Diary                          | -0.040***         | -0.010***         | 0.028***          | 0.148***          | -0.007***         | -0.019***         | -0.011***         | 0.275***          | <b>-0.882</b> *** | 0.047***          | 0.140***          | 0.102***          | -0.676***         |
| Seafood                        | -0.024***         | -0.025***         | -0.017***         | -0.014***         | -0.020***         | 0.009***          | 0.011***          | -0.049***         | 0.000***          | <b>-0.862</b> *** | -0.077***         | 0.042***          | 0.046***          |
| Vegetables                     | -0.035***         | 0.022***          | -0.002***         | -0.024***         | -0.028***         | 0.000***          | 0.012***          | -0.034***         | -0.015***         | -0.021***         | <b>-0.769</b> *** | -0.031***         | 0.142***          |
| Fruits                         | 0.060***          | 0.010***          | 0.028***          | -0.085***         | -0.041***         | 0.014***          | 0.000***          | -0.002***         | 0.031***          | 0.029***          | -0.069***         | <b>-0.852</b> *** | 0.072***          |
| Other grains                   | 1.904***          | 0.221***          | 0.282***          | -0.231***         | -1.781***         | -0.749***         | -0.111***         | 1.554***          | -2.460***         | 0.151***          | 1.517***          | 0.357***          | <b>-1.323</b> *** |
| Income elasticity              | 0.694***          | 0.651***          | 0.743***          | 0.734***          | 1.020***          | 0.979***          | 0.724***          | 0.579***          | 0.766***          | 0.829***          | 0.662***          | 0.678***          | 0.565***          |

Notes: \*\*\* p < 0.01. The bold font is own-price elasticity.

**Table S4.** Unconditional Marshall price elasticity and income elasticity (lower-middle-income group)

|                                | Rice              | Wheat             | Oils              | Pork              | Beef              | Mutton            | Poultry           | Eggs              | Diary             | Seafood           | Vegetables        | Fruits            | Other grains      |
|--------------------------------|-------------------|-------------------|-------------------|-------------------|-------------------|-------------------|-------------------|-------------------|-------------------|-------------------|-------------------|-------------------|-------------------|
| Unconditional price elasticity |                   |                   |                   |                   |                   |                   |                   |                   |                   |                   |                   |                   |                   |
| Rice                           | <b>-1.073</b> *** | 0.013***          | -0.006***         | 0.025***          | -0.010***         | 0.018***          | 0.020***          | -0.097***         | -0.002**          | -0.037***         | -0.084***         | 0.025***          | 0.442***          |
| Wheat                          | 0.023***          | <b>-1.187</b> *** | -0.025***         | 0.065***          | 0.042***          | 0.039***          | 0.051***          | -0.054***         | -0.004***         | -0.008***         | 0.149***          | 0.013***          | 0.139***          |
| Oils                           | -0.022***         | -0.006***         | <b>-0.966</b> *** | 0.046***          | -0.010***         | 0.003***          | 0.017***          | -0.013***         | 0.021***          | -0.009***         | 0.005***          | 0.025***          | 0.060***          |
| Pork                           | 0.045***          | 0.015***          | 0.016***          | <b>-0.777</b> *** | 0.001***          | -0.026***         | 0.012***          | -0.038***         | -0.005***         | -0.013***         | -0.049***         | -0.026***         | 0.009***          |
| Beef                           | 0.222***          | 0.010***          | 0.031***          | 0.045***          | <b>-0.811</b> *** | -0.009***         | 0.066***          | 0.081***          | -0.019***         | 0.055***          | 0.092***          | 0.029***          | -0.959***         |
| Mutton                         | -0.014***         | 0.021***          | 0.041***          | -0.179***         | 0.008***          | <b>-0.774</b> *** | 0.043***          | 0.138***          | -0.014***         | 0.057***          | 0.046***          | 0.067***          | -0.504***         |
| Poultry                        | 0.028***          | 0.016***          | 0.013***          | 0.025***          | 0.016***          | 0.008***          | <b>-0.981</b> *** | 0.006***          | -0.003***         | 0.009***          | 0.031***          | 0.011***          | -0.013***         |
| Eggs                           | -0.129***         | 0.006***          | -0.025***         | -0.146***         | -0.041***         | -0.011***         | 0.014***          | <b>-0.657</b> *** | -0.012***         | -0.032***         | -0.099***         | 0.009***          | 0.452***          |
| Diary                          | -0.027***         | -0.006***         | 0.015***          | 0.100***          | -0.016***         | -0.017***         | -0.002***         | 0.203***          | <b>-0.855</b> *** | 0.032***          | 0.116***          | 0.079***          | -0.484***         |
| Seafood                        | -0.030***         | 0.003***          | -0.014***         | -0.049***         | -0.011***         | 0.004***          | 0.012***          | -0.029***         | -0.004***         | <b>-0.845</b> *** | -0.062***         | 0.039***          | 0.014***          |
| Vegetables                     | -0.036***         | 0.011***          | 0.003***          | -0.050***         | -0.027***         | -0.004***         | 0.018***          | -0.027***         | -0.006***         | -0.018***         | <b>-0.728</b> *** | -0.014***         | 0.114***          |
| Fruits                         | 0.040***          | 0.005***          | 0.021***          | -0.054***         | -0.029***         | 0.008***          | 0.012***          | 0.004***          | 0.025***          | 0.027***          | -0.029***         | <b>-0.864</b> *** | 0.058***          |
| Other grains                   | 1.835***          | 0.232***          | 0.284***          | 0.118***          | -1.792***         | -0.698***         | -0.076***         | 1.387***          | -2.097***         | 0.057***          | 1.327***          | 0.342***          | <b>-1.524</b> *** |
| Income elasticity              | 0.567***          | 0.562***          | 0.629***          | 0.619***          | 0.865***          | 0.791***          | 0.619***          | 0.499***          | 0.639***          | 0.721***          | 0.567***          | 0.575***          | 0.449***          |

Notes: \*\* p < 0.05, \*\*\* p < 0.01. The bold font is own-price elasticity.

Table S5. Unconditional Marshall price elasticity and income elasticity (middle-income group)

|                                | Rice              | Wheat             | Oils              | Pork              | Beef              | Mutton            | Poultry           | Eggs              | Diary             | Seafood           | Vegetables        | Fruits            | Other grains      |
|--------------------------------|-------------------|-------------------|-------------------|-------------------|-------------------|-------------------|-------------------|-------------------|-------------------|-------------------|-------------------|-------------------|-------------------|
| Unconditional price elasticity |                   |                   |                   |                   |                   |                   |                   |                   |                   |                   |                   |                   |                   |
| Rice                           | <b>-1.044</b> *** | 0.012***          | -0.002***         | 0.014***          | -0.005***         | 0.023***          | 0.020***          | -0.080***         | -0.004***         | -0.038***         | -0.082***         | 0.020***          | 0.440***          |
| Wheat                          | 0.022***          | <b>-1.174</b> *** | -0.019***         | 0.051***          | 0.039***          | 0.037***          | 0.055***          | -0.058***         | -0.004***         | 0.009***          | 0.126***          | 0.010***          | 0.155***          |
| Oils                           | -0.019***         | -0.004***         | <b>-0.953</b> *** | 0.041***          | -0.008***         | 0.004***          | 0.015***          | -0.009***         | 0.020***          | -0.005***         | 0.011***          | 0.025***          | 0.059***          |
| Pork                           | 0.040***          | 0.013***          | 0.013***          | <b>-0.761</b> *** | -0.001***         | -0.020***         | 0.016***          | -0.033***         | -0.005***         | -0.015***         | -0.053***         | -0.019***         | 0.021***          |
| Beef                           | 0.222***          | 0.008***          | 0.033***          | 0.034***          | <b>-0.805</b> *** | -0.012***         | 0.061***          | 0.075***          | -0.023***         | 0.058***          | 0.094***          | 0.040***          | -0.912***         |
| Mutton                         | 0.000***          | 0.017***          | 0.042***          | -0.132***         | 0.003***          | <b>-0.805</b> *** | 0.041***          | 0.133***          | -0.014***         | 0.047***          | 0.044***          | 0.054***          | -0.439***         |
| Poultry                        | 0.027***          | 0.016***          | 0.011***          | 0.032***          | 0.014***          | 0.007***          | <b>-0.983</b> *** | 0.007***          | 0.002***          | 0.011***          | 0.039***          | 0.019***          | -0.011***         |
| Eggs                           | -0.106***         | 0.008***          | -0.018***         | -0.134***         | -0.042***         | -0.008***         | 0.016***          | <b>-0.677</b> *** | -0.006***         | -0.024***         | -0.101***         | 0.011***          | 0.422***          |
| Diary                          | -0.024***         | -0.003***         | 0.012***          | 0.086***          | -0.018***         | -0.017***         | 0.005***          | 0.180***          | <b>-0.846</b> *** | 0.028***          | 0.109***          | 0.071***          | -0.422***         |
| Seafood                        | -0.025***         | 0.011***          | -0.007***         | -0.050***         | -0.008***         | 0.001***          | 0.015***          | -0.019***         | -0.004***         | <b>-0.847</b> *** | -0.051***         | 0.041***          | 0.007***          |
| Vegetables                     | -0.034***         | 0.006***          | 0.005***          | -0.055***         | -0.026***         | -0.004***         | 0.021***          | -0.026***         | -0.002***         | -0.016***         | <b>-0.710</b> *** | -0.008***         | 0.103***          |
| Fruits                         | 0.033***          | 0.004***          | 0.019***          | -0.037***         | -0.024***         | 0.005***          | 0.019***          | 0.005***          | 0.023***          | 0.029***          | -0.015***         | <b>-0.869</b> *** | 0.050***          |
| Other grains                   | 1.856***          | 0.256***          | 0.281***          | 0.278***          | -1.838***         | -0.671***         | -0.065***         | 1.322***          | -2.042***         | 0.034***          | 1.269***          | 0.330***          | <b>-1.588</b> *** |
| Income elasticity              | 0.476***          | 0.492***          | 0.540***          | 0.529***          | 0.741***          | 0.663***          | 0.532***          | 0.434***          | 0.552***          | 0.616***          | 0.491***          | 0.499***          | 0.380***          |

Notes: \*\* p < 0.05, \*\*\* p < 0.01. The bold font is own-price elasticity.

**Table S6.** Unconditional Marshall price elasticity and income elasticity (upper-middle-income group)

|                                | Rice              | Wheat             | Oils              | Pork              | Beef              | Mutton            | Poultry           | Eggs              | Diary             | Seafood           | Vegetables        | Fruits            | Other grains      |
|--------------------------------|-------------------|-------------------|-------------------|-------------------|-------------------|-------------------|-------------------|-------------------|-------------------|-------------------|-------------------|-------------------|-------------------|
| Unconditional price elasticity |                   |                   |                   |                   |                   |                   |                   |                   |                   |                   |                   |                   |                   |
| Rice                           | <b>-1.011</b> *** | 0.012***          | 0.002***          | 0.001**           | 0.003***          | 0.027***          | 0.020***          | -0.055***         | -0.005***         | -0.036***         | -0.077***         | 0.015***          | 0.424***          |
| Wheat                          | 0.027***          | <b>-1.170</b> *** | -0.016***         | 0.024***          | 0.037***          | 0.034***          | 0.066***          | -0.080***         | -0.007***         | 0.030***          | 0.111***          | 0.006***          | 0.201***          |
| Oils                           | -0.016***         | -0.001**          | <b>-0.938</b> *** | 0.033***          | -0.005***         | 0.008***          | 0.015***          | -0.004***         | 0.019***          | 0.000             | 0.018***          | 0.026***          | 0.058***          |
| Pork                           | 0.036***          | 0.010***          | 0.010***          | <b>-0.739</b> *** | -0.003***         | -0.016***         | 0.020***          | -0.029***         | -0.004***         | -0.017***         | -0.057***         | -0.011***         | 0.033***          |
| Beef                           | 0.220***          | 0.007***          | 0.036***          | 0.020***          | <b>-0.798</b> *** | -0.018***         | 0.058***          | 0.069***          | -0.025***         | 0.060***          | 0.097***          | 0.052***          | -0.839***         |
| Mutton                         | 0.012***          | 0.014***          | 0.051***          | -0.100***         | -0.005***         | <b>-0.817</b> *** | 0.042***          | 0.142***          | -0.015***         | 0.043***          | 0.036***          | 0.047***          | -0.411***         |
| Poultry                        | 0.026***          | 0.016***          | 0.009***          | 0.039***          | 0.012***          | 0.006***          | <b>-0.982</b> *** | 0.009***          | 0.008***          | 0.015***          | 0.047***          | 0.027***          | -0.008***         |
| Eggs                           | -0.075***         | 0.007***          | -0.011***         | -0.125***         | -0.043***         | -0.005***         | 0.021***          | <b>-0.697</b> *** | 0.001***          | -0.014***         | -0.105***         | 0.014***          | 0.388***          |
| Diary                          | -0.020***         | -0.002***         | 0.009***          | 0.075***          | -0.019***         | -0.016***         | 0.012***          | 0.160***          | <b>-0.835</b> *** | 0.026***          | 0.103***          | 0.066***          | -0.370***         |
| Seafood                        | -0.020***         | 0.017***          | -0.002***         | -0.048***         | -0.005***         | -0.002***         | 0.020***          | -0.010***         | -0.002***         | <b>-0.847</b> *** | -0.039***         | 0.044***          | 0.000***          |
| Vegetables                     | -0.032***         | -0.001***         | 0.007***          | -0.059***         | -0.023***         | -0.005***         | 0.026***          | -0.026***         | 0.001***          | -0.014***         | <b>-0.688</b> *** | 0.000             | 0.092***          |
| Fruits                         | 0.028***          | 0.003***          | 0.016***          | -0.021***         | -0.017***         | 0.002***          | 0.026***          | 0.005***          | 0.022***          | 0.031***          | 0.000             | <b>-0.877</b> *** | 0.041***          |
| Other grains                   | 1.809***          | 0.289***          | 0.264***          | 0.439***          | -1.809***         | -0.610***         | -0.050***         | 1.186***          | -1.928***         | 0.001***          | 1.155***          | 0.298***          | <b>-1.613</b> *** |
| Income elasticity              | 0.366***          | 0.395***          | 0.423***          | 0.412***          | 0.568***          | 0.515***          | 0.417***          | 0.346***          | 0.436***          | 0.479***          | 0.388***          | 0.397***          | 0.305***          |

Notes: \*\* p < 0.05, \*\*\* p < 0.01. The bold font is own-price elasticity.

Table S7. Unconditional Marshall price elasticity and income elasticity (high-income group)

|                                | Rice              | Wheat             | Oils              | Pork              | Beef              | Mutton            | Poultry           | Eggs              | Diary             | Seafood           | Vegetables        | Fruits            | Other grains      |
|--------------------------------|-------------------|-------------------|-------------------|-------------------|-------------------|-------------------|-------------------|-------------------|-------------------|-------------------|-------------------|-------------------|-------------------|
| Unconditional price elasticity |                   |                   |                   |                   |                   |                   |                   |                   |                   |                   |                   |                   |                   |
| Rice                           | <b>-0.947</b> *** | 0.010***          | 0.008***          | -0.002***         | 0.021***          | 0.026***          | 0.025***          | -0.001 *          | -0.002***         | -0.031***         | -0.088***         | 0.007***          | 0.351***          |
| Wheat                          | 0.067***          | <b>-1.161</b> *** | -0.013***         | -0.119***         | -0.003***         | 0.011***          | 0.102***          | -0.226***         | -0.065***         | 0.114***          | 0.113***          | -0.049***         | 0.486***          |
| Oils                           | -0.005***         | 0.006***          | <b>-0.901</b> *** | 0.030***          | 0.002***          | 0.009***          | 0.015***          | 0.004***          | 0.008***          | 0.010***          | 0.035***          | 0.022***          | 0.061***          |
| Pork                           | 0.023***          | 0.002***          | 0.008***          | <b>-0.707</b> *** | -0.003***         | -0.008***         | 0.034***          | -0.025***         | -0.005***         | -0.015***         | -0.067***         | 0.003***          | 0.053***          |
| Beef                           | 0.209***          | 0.007***          | 0.038***          | 0.022***          | <b>-0.738</b> *** | -0.027***         | 0.061***          | 0.038***          | -0.041***         | 0.081***          | 0.062***          | 0.059***          | -0.669***         |
| Mutton                         | 0.038***          | 0.006***          | 0.068***          | -0.063***         | -0.020***         | <b>-0.789</b> *** | 0.051***          | 0.170***          | -0.029***         | 0.049***          | 0.000             | 0.035***          | -0.372***         |
| Poultry                        | 0.023***          | 0.014***          | 0.007***          | 0.060***          | 0.010***          | 0.004***          | <b>-0.976</b> *** | 0.010***          | 0.015***          | 0.024***          | 0.058***          | 0.040***          | -0.002***         |
| Eggs                           | -0.003***         | 0.004***          | 0.003***          | -0.145***         | -0.049***         | 0.000             | 0.032***          | <b>-0.722</b> *** | 0.007***          | 0.010***          | -0.140***         | 0.013***          | 0.363***          |
| Diary                          | -0.022***         | -0.005***         | -0.001***         | 0.068***          | -0.021***         | -0.015***         | 0.027***          | 0.151***          | <b>-0.810</b> *** | 0.033***          | 0.102***          | 0.057***          | -0.346***         |
| Seafood                        | -0.014***         | 0.028***          | 0.006***          | -0.036***         | 0.007***          | -0.002***         | 0.031***          | 0.004***          | 0.005***          | <b>-0.853</b> *** | -0.018***         | 0.048***          | -0.018***         |
| Vegetables                     | -0.038***         | -0.014***         | 0.012***          | -0.081***         | -0.019***         | -0.008***         | 0.040***          | -0.029***         | 0.004***          | -0.009***         | <b>-0.631</b> *** | 0.012***          | 0.074***          |
| Fruits                         | 0.017***          | -0.003***         | 0.011***          | 0.006***          | -0.007***         | -0.002***         | 0.042***          | 0.004***          | 0.016***          | 0.038***          | 0.018***          | <b>-0.885</b> *** | 0.026***          |
| Other grains                   | 1.780***          | 0.468***          | 0.274***          | 0.873***          | -1.583***         | -0.428***         | -0.015***         | 1.042***          | -2.113***         | -0.127***         | 1.015***          | 0.229***          | <b>-2.023</b> *** |
| Income elasticity              | 0.166***          | 0.198***          | 0.187***          | 0.188***          | 0.239***          | 0.229***          | 0.190***          | 0.167***          | 0.209***          | 0.216***          | 0.183***          | 0.192***          | 0.162***          |

Notes: \* p < 0.10, \*\*\* p < 0.01. The bold font is own-price elasticity.
